# Supplementary material for: A water soluble copper(ii) complex as a HSO4− ion selective turn-on fluorescent sensor applicable in living cell imaging
Source: Royal Society of Chemistry journal article supplement (doi:10.1039/c5ra09121g), 2015-01-01
Supplement: c5ra09121g1.pdf [file c5ra09121g1.pdf]

*Supporting Information*

*for*

**A water soluble copper(II) complex as a  $\text{HSO}_4^-$  ion selective turn-on fluorescent sensor applicable in living cell imaging<sup>†</sup>**

*Buddhadeb Sen, Manjira Mukherjee, Siddhartha Pal, Supriti Sen and Pabitra Chattopadhyay\**

*Department of Chemistry, Burdwan University, Golapbag, Burdwan, 713104, India*

Corresponding author: [pabitracc@yahoo.com](mailto:pabitracc@yahoo.com)

## CONTENTS

---

|                                                                                                                                                                              |                           |
|------------------------------------------------------------------------------------------------------------------------------------------------------------------------------|---------------------------|
| Synthetic pathway of the organic moiety HL.....                                                                                                                              | <b>Scheme S1</b>          |
| Plausible mechanism of hydrogen sulphate sensing. ....                                                                                                                       | <b>Scheme S2</b>          |
| ESI-MS & <sup>1</sup> H NMR spectrum of HL.....                                                                                                                              | <b>Figs. S1 &amp; S2</b>  |
| ESI-MS spectrum of complex-1.....                                                                                                                                            | <b>Fig. S3</b>            |
| IR & ESI-MS spectrum of <b>1.HSO<sub>4</sub><sup>-</sup></b> .....                                                                                                           | <b>Figs. S4 - S5</b>      |
| An ORTEP view with atom numbering scheme of HL.NMe <sub>2</sub> CHO .....                                                                                                    | <b>Fig. S6</b>            |
| Crystal packing of complex-1.....                                                                                                                                            | <b>Fig. S7</b>            |
| Emission spectra of <b>HL</b> (10 μM) on gradual addition of HSO <sub>4</sub> <sup>-</sup> ions (50 μM) in DMSO: water (1:9) HEPES buffer (1 mM, pH 7.4) at 25 °C.....       | <b>Fig. S8</b>            |
| Emission spectra of HL (10 μM) on gradual addition of Cu <sup>2+</sup> ions (upto 50 μM) in DMSO: water (1:9) at 25 °C (λ <sub>ex</sub> = 390 nm).....                       | <b>Fig. S9</b>            |
| Relative Fluorescence emission intensity assay of <b>HL</b> (10 μM) in presence of different metal ion in HEPES buffer (1 mM, pH 7.4) at 25 °C (λ <sub>ex</sub> = 390 nm)... | <b>Fig. S10</b>           |
| Different fluorimetric plots.....                                                                                                                                            | <b>Figs. S11 - S17</b>    |
| CV of complex <b>1</b> and <b>1</b> in presence of different ions in DMF solution.....                                                                                       | <b>Figs. S18-19</b>       |
| EPR spectra of complex <b>1</b> and <b>1.HSO<sub>4</sub><sup>-</sup></b> adduct.....                                                                                         | <b>Fig. S20</b>           |
| Some HOMO and LUMO's of Complex-1, <b>1.HSO<sub>4</sub><sup>-</sup></b> adduct.....                                                                                          | <b>Figs. S21 – S22</b>    |
| Optimized structure of Complex-1, <b>1-HSO<sub>4</sub><sup>-</sup></b> (Ring) and <b>1-HSO<sub>4</sub><sup>-</sup></b> (Linear).....                                         | <b>Fig. S23</b>           |
| Cytotoxic effect of Complex-1.....                                                                                                                                           | <b>Fig. S24</b>           |
| Table for crystal data of HL & complex-1.....                                                                                                                                | <b>Table S1</b>           |
| Selected bond distances (Å) and bond angles (°) for HL & complex-1.....                                                                                                      | <b>Tables S2 &amp; S3</b> |
| E <sub>1/2</sub> values of complex-1 in presence of different ions.....                                                                                                      | <b>Table S4</b>           |
| HOMO-LUMO energy of Complex-1, <b>1.HSO<sub>4</sub><sup>-</sup></b> (path-A / path-B).....                                                                                   | <b>Table S5</b>           |
| HOMO-LUMO energy, E <sub>ex</sub> , f and Key transitions from TDDFT calculations of Complex-1, <b>1-HSO<sub>4</sub><sup>-</sup></b> adduct.....                             | <b>Tables S6 - S8</b>     |

---

## Experimental section

### Materials and physical measurements

High-purity HEPES [*4-(2-hydroxyethyl)-1-piperazine-ethane-sulfonic acid*], *2-(2-aminophenyl)benzimidazole* and *2-hydroxy-benzaldehyde* were purchased from Sigma Aldrich (India),  $\text{CuCl}_2$  and *sodium hydrogen sulphate* were purchased from Merck. Other chemicals, sodium perchlorate, disodium hydrogen arsenate, tetra butyl ammonium salt of chloride, bromide, iodide, acetate, fluoride, dihydrogen phosphate and sodium hydrogen sulphate; nitrate salts of sodium, potassium, copper(II), chromium(III), silver(I), acetate salt of manganese(II), zinc(II), chloride salts of nickel(II), cobalt(II), mercury(II), calcium (II), magnesium(II), iron(III), iron(II) were of analytical reagent grade and used without further purification except when specified. Milli-Q,  $18.2 \text{ M}\Omega \text{ cm}^{-1}$  water was used throughout all experiments. All of the solvents were of analytical grade.

The elemental analyses (C, H and N) were performed on a Perkin Elmer 2400 elemental analyzer. Copper analysis was carried out by Varian atomic absorption spectrophotometer (AAS) model-AA55B, GTA. A Shimadzu (model UV-1800) spectrophotometer was used for recording electronic spectra.  $^1\text{H}$ NMR spectrum of organic moiety was obtained on a Bruker Avance DPX 300 spectrometer using  $\text{DMSO-d}_6$  solution. Electrospray ionization (ESI) mass spectra were recorded on a Qtof Micro YA263 mass spectrometer. A Systronics digital pH meter (model 335) was used to measure the pH of the solution and the adjustment of pH was done using either 50 mM HCl or NaOH solution. Steady-state fluorescence emission and excitation spectra were recorded with a Hitachi-4500 spectrofluorimeter. Time-resolved fluorescence lifetime measurements were performed using a HORIBA JOBIN Yvon picosecond pulsed diode laser-based time-correlated single-photon counting (TCSPC) spectrometer from IBH (UK) at  $\lambda_{\text{ex}} = 377 \text{ nm}$  and MCP-PMT as a detector. Emission from the sample was collected at a right angle to the direction of the excitation beam maintaining magic angle polarization (54.71). The full width at half-maximum (FWHM) of the instrument response function was 250 ps, and the resolution was 28.6 ps per channel. Data were fitted to multi exponential functions after de convolution of the instrument response

function by an iterative re convolution technique using IBH DAS 6.2 data analysis software in which reduced  $w^2$  and weighted residuals serve as parameters for goodness of fit. Redox potentials were measured in CHI620D potentiometer in DMF using TBAP as supporting electrolyte at room temperature. X-band EPR spectra were taken on the Bruker EMX EPR spectrometer with a variable temperature liquid nitrogen cryostat.

The pH study was done in 1 mM HEPES buffer solution by adjusting pH with HCl or NaOH. The stock solutions ( $\sim 10^{-2}$  M) for the selectivity study of the probe (**1**) towards different anions and cations were prepared taking sodium perchlorate, disodium hydrogen arsenate, tetra butyl ammonium salt of chloride, bromide, iodide, acetate, fluoride, dihydrogen phosphate and sodium hydrogen sulphate; nitrate salts of  $\text{Na}^+$ ,  $\text{K}^+$ ,  $\text{Cu}^{2+}$ ,  $\text{Cr}^{3+}$ ,  $\text{Ag}^+$ , acetate salt of  $\text{Mn}^{2+}$ ,  $\text{Zn}^{2+}$ , chloride salts of  $\text{Ni}^{2+}$ ,  $\text{Co}^{2+}$ ,  $\text{Hg}^{2+}$ ,  $\text{Ca}^{2+}$ ,  $\text{Mg}^{2+}$ ,  $\text{Fe}^{3+}$  ions and Fe(II)sulphate to the above solvent. In this selectivity study, the amounts of these anions were taken hundred times greater than that of the receptor. Fluorescence titration of **1** was performed with  $\text{NaHSO}_4$ . All the fluorescence and absorbance spectra were taken after 15 minutes of mixing of the components to acquire the optimised spectra.

#### Synthesis of 2-(5,6-dihydro-benzo[4,5]imidazo[1,2-c]quinazolin-6-yl)-phenol (HL)

A methanolic solution of 2-(2-aminophenyl)benzimidazole, (2.09 g, 10.0 mmol) was added to the solution of 2-hydroxy-benzaldehyde (1.22 g, 10.0 mmol) in methanol (25 mL) at room temperature with stirring. The resulting mixture was then allowed to reflux for 6.0 h. A crystalline precipitate of the compound (HL) was obtained from the yellow colored solution through slow evaporation of the solvent (Scheme S1). Pale yellow colored rectangular shaped single crystals of (HL) suitable for X-ray crystallography were obtained on slow evaporation of the DMF-methanol mixture solution.

**HL.  $\text{C}_{20}\text{H}_{15}\text{N}_3\text{O}$ :** Anal. Found: C, 76.89; H, 4.95; N, 13.17; Calc. C, 76.66; H, 4.82; N, 13.41. ESI-MS:  $[\text{M} + \text{H}]^+$ ,  $m/z$ , 314.3490 (100 %) (Fig. S1 ESI<sup>†</sup>) (calcd.:  $m/z$ , 314.12; where M = molecular weight of HL);  $^1\text{H}$  NMR ( $\delta$ , ppm in  $\text{DMSO-d}_6$ ): 10.26 (s, 1H, O-H); 7.96 (dd, 1H); 7.65 (d, 1H); 7.31-7.23 (m, 4H); 7.20-7.11 (m, 2H); 6.87-6.73 (m, 3H); 6.60 (dd, 1H); 6.44 (dd, 1H); 4.40 (s, 1H, N-H) (Fig. S2 ESI<sup>†</sup>). Yield: 90%.



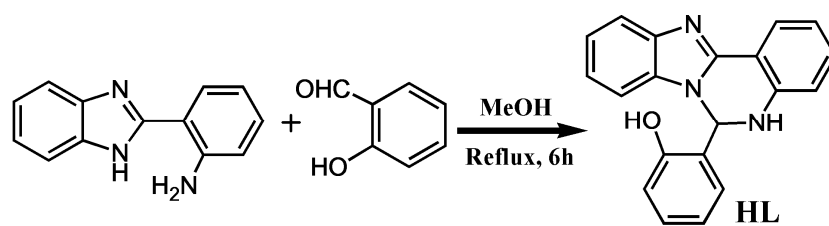

**Scheme S1** Synthetic pathway of the organic moiety HL.

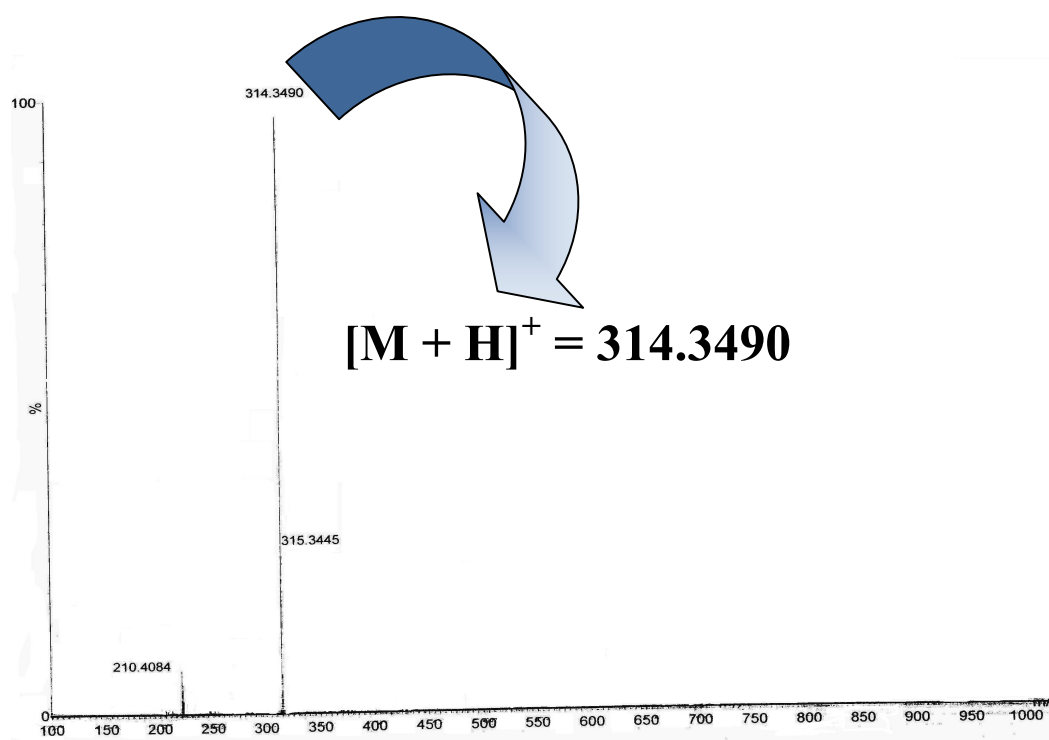

**Fig. S1** ESI-MS spectrum of HL

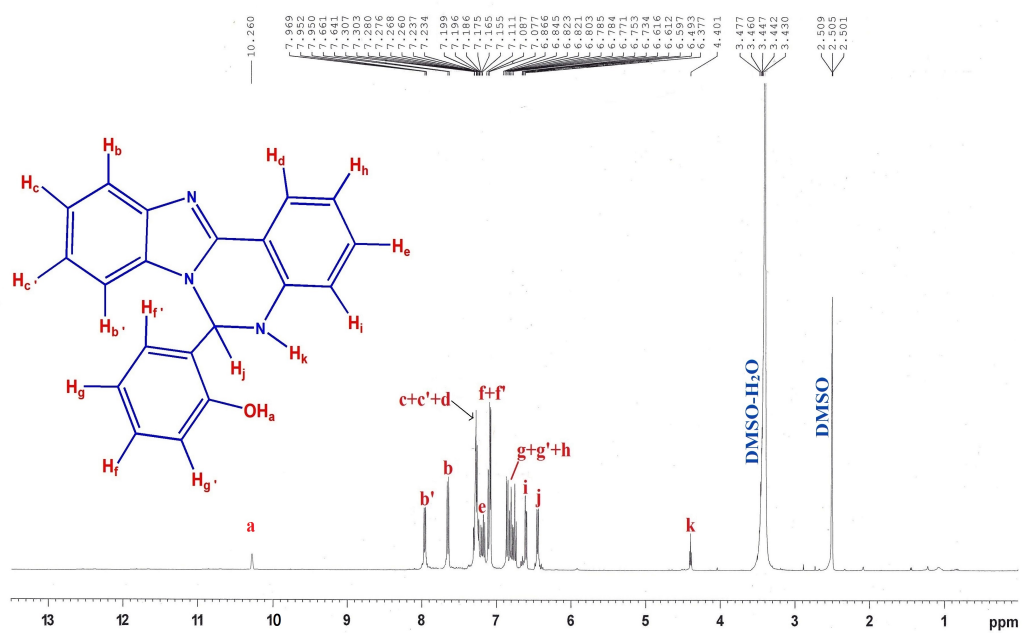

Fig. S2  $^1H$  NMR of the HL in DMSO- $d_6$

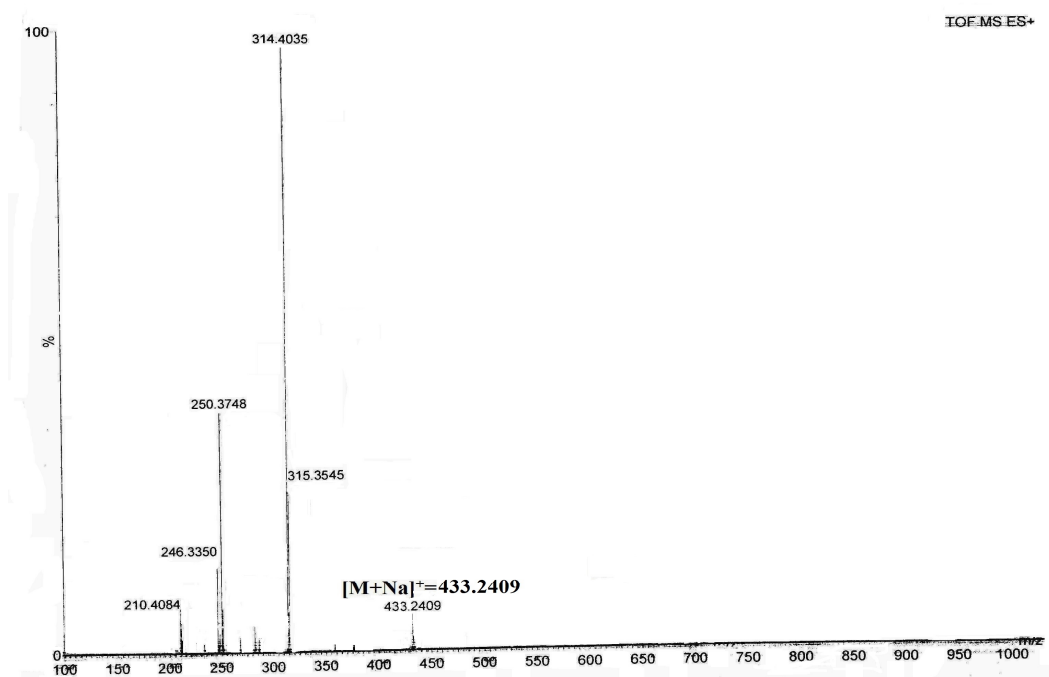

Fig. S3 ESI-MS spectrum of the probe (complex-1)

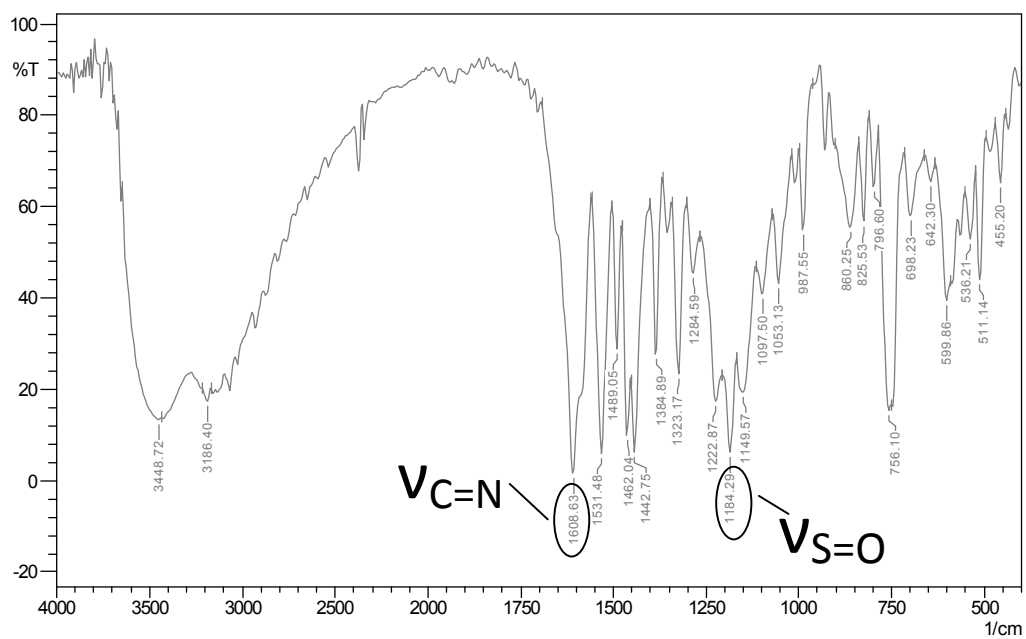

Fig. S4 IR spectrum of 1.NaHSO<sub>4</sub> adduct

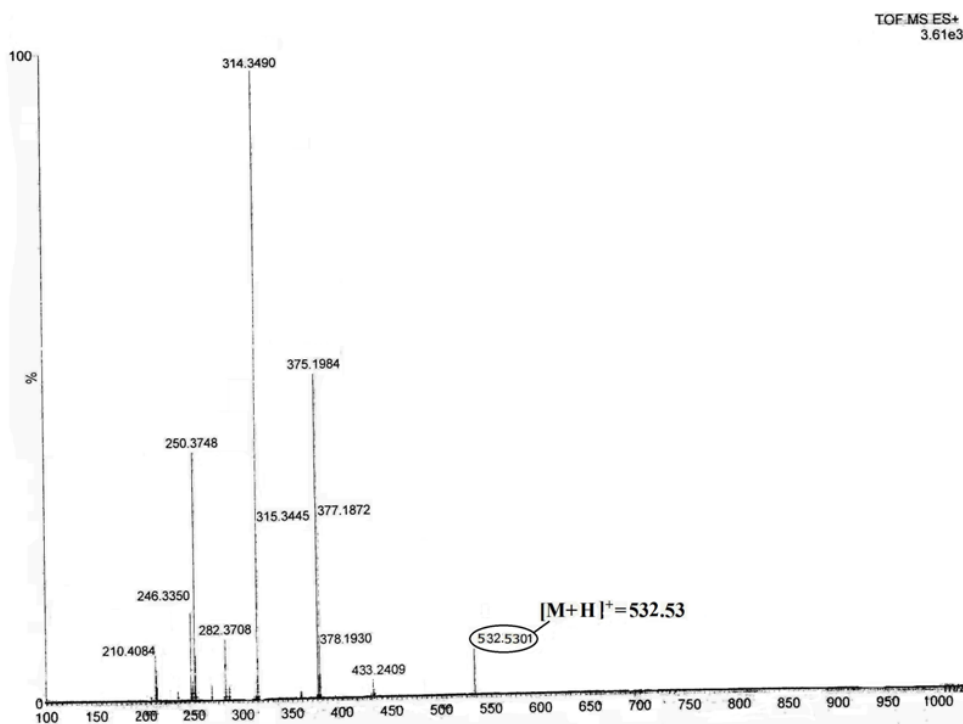

Fig. S5 ESI-MS spectrum of 1.NaHSO<sub>4</sub> adduct

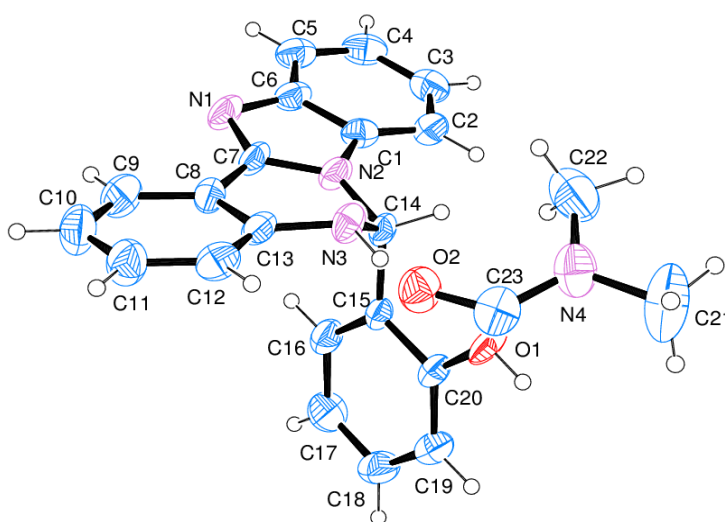

Fig. S6 An ORTEP view (30% probability) with atom numbering scheme of HL.NMe<sub>2</sub>CHO.

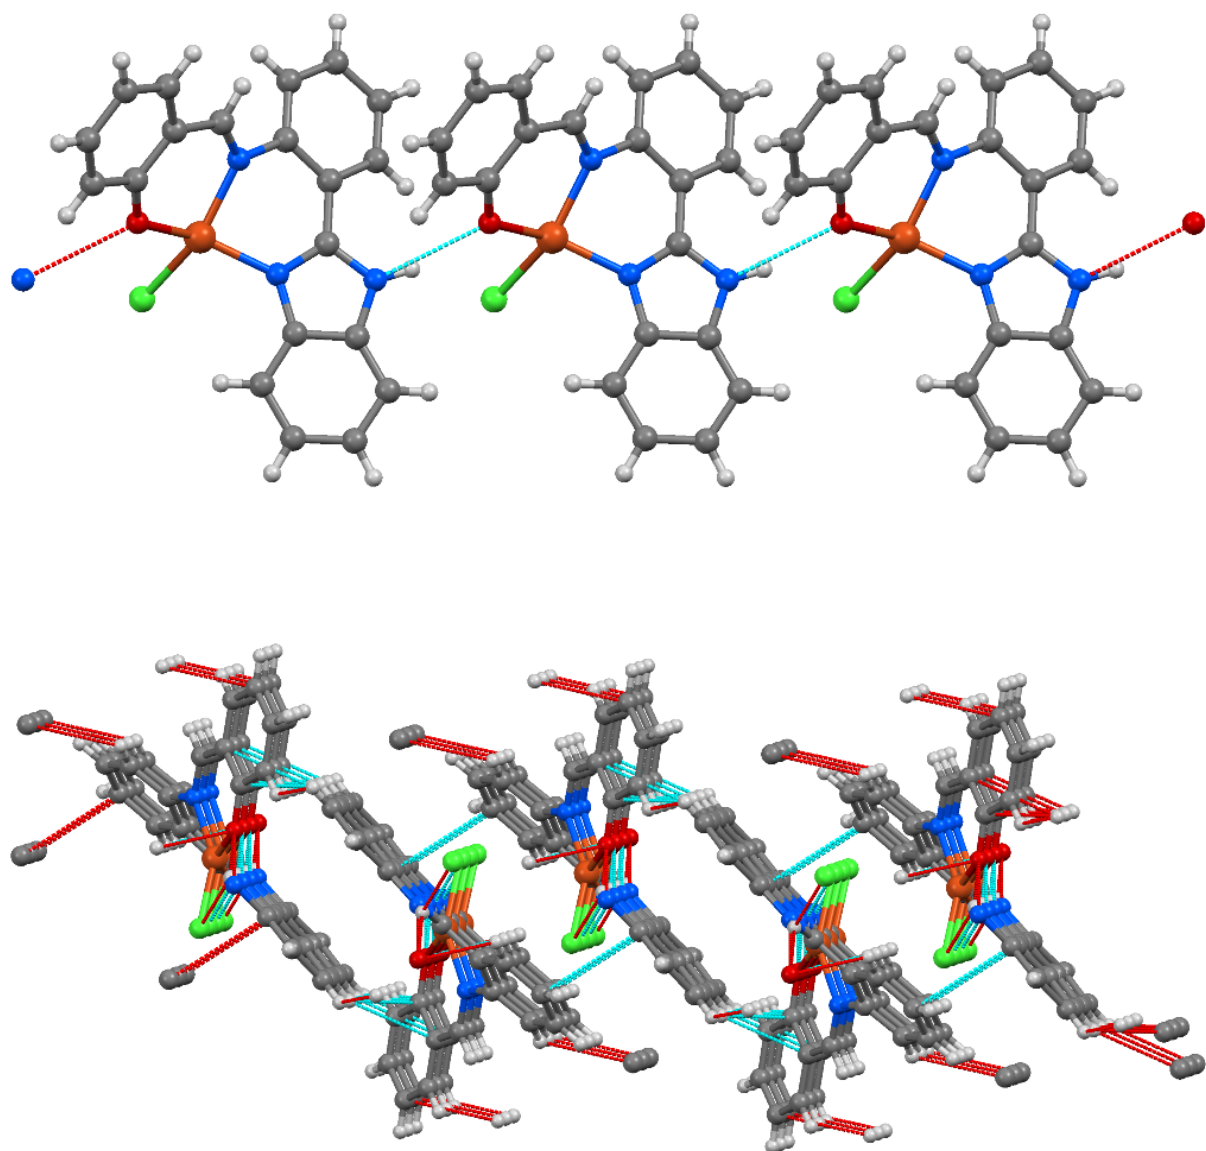

**Fig. S7** Crystal packing of complex-1 due to hydrogen bonds along with some other weaker interactions ( $\pi \dots \pi$ ,  $C-H \dots \pi$ ) are responsible for the crystal packing forming a 1D chain and 2D layered arrangement.

**Scheme S2** Plausible mechanism of hydrogen sulphate sensing.

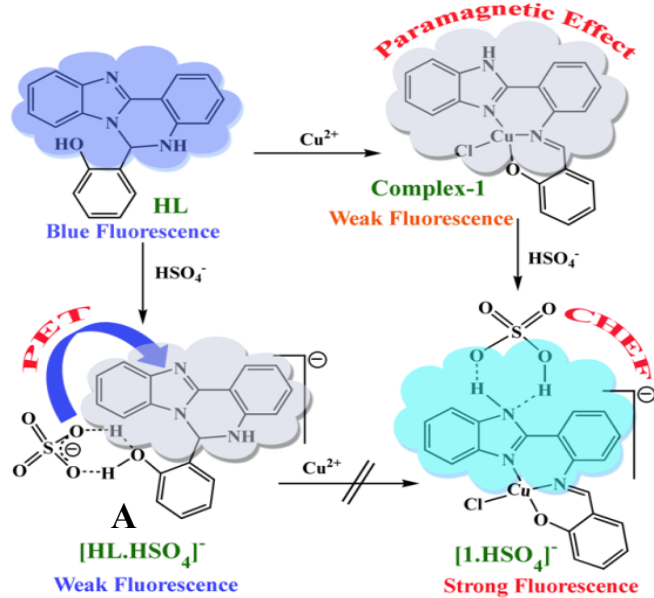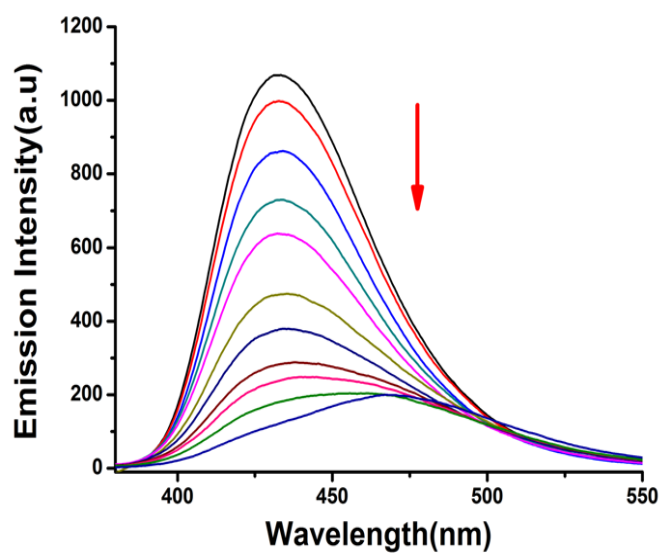

**Fig. S8** Emission spectra of **HL** (10 μM) on gradual addition of  $\text{HSO}_4^-$  ions (50 μM) in DMSO: water (1:9) HEPES buffer (1 mM, pH 7.4) at 25 °C.

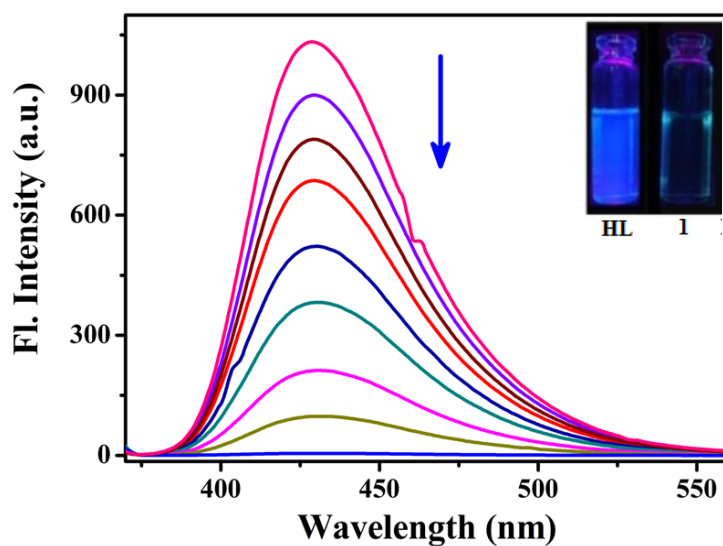

**Fig. S9** Emission spectra of **HL** (10  $\mu\text{M}$ ) on gradual addition of  $\text{Cu}^{2+}$  ions (upto 50  $\mu\text{M}$ ) in DMSO: water (1:9) at 25  $^{\circ}\text{C}$  ( $\lambda_{\text{ex}} = 390 \text{ nm}$ ).

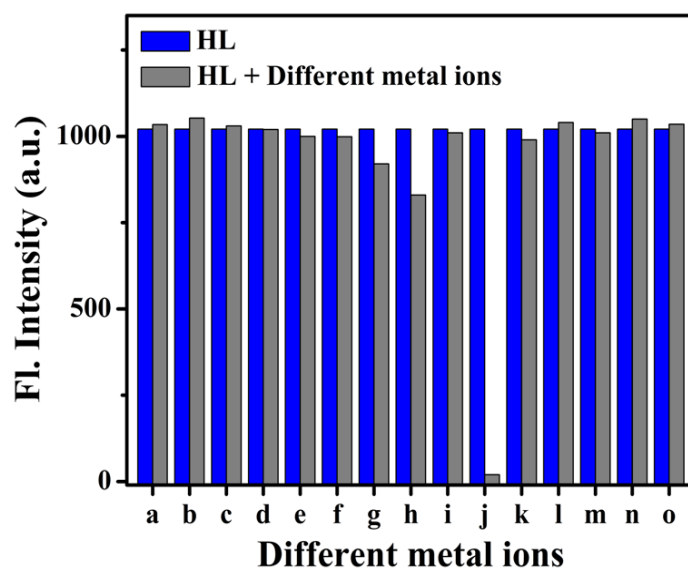

**Fig. S10** Relative Fluorescence emission intensity assay of **HL** (10  $\mu\text{M}$ ) in presence of different metal ion salts in HEPES buffer (1 mM, pH 7.4) at 25  $^{\circ}\text{C}$  ( $\lambda_{\text{ex}} = 390 \text{ nm}$ ) where a)  $\text{Na}^+$ , b)  $\text{K}^+$ , c)  $\text{Ca}^{2+}$ , d)  $\text{Mg}^{2+}$ , e)  $\text{Cr}^{3+}$ , f)  $\text{Mn}^{2+}$ , g)  $\text{Fe}^{3+}$ , h)  $\text{Co}^{2+}$ , i)  $\text{Ni}^{2+}$ , j)  $\text{Cu}^{2+}$ , k)  $\text{Zn}^{2+}$ , l)  $\text{Cd}^{2+}$ , m)  $\text{Hg}^{2+}$ , n)  $\text{Al}^{3+}$ , and o)  $\text{Pb}^{2+}$  at  $\lambda_{\text{em}} = 430 \text{ nm}$ .



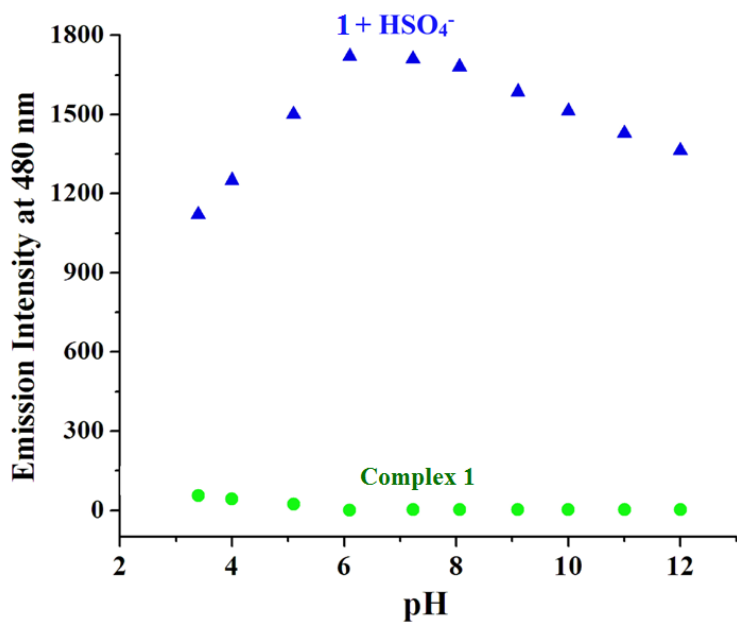

**Fig. S11** Fluorescence response of complex 1 (10 μM) and 1 (10 μM) in presence of HSO<sub>4</sub><sup>-</sup> ions (10 μM) in aqueous DMSO: water (1:9) media at different pH at λ<sub>em</sub>= 480nm.

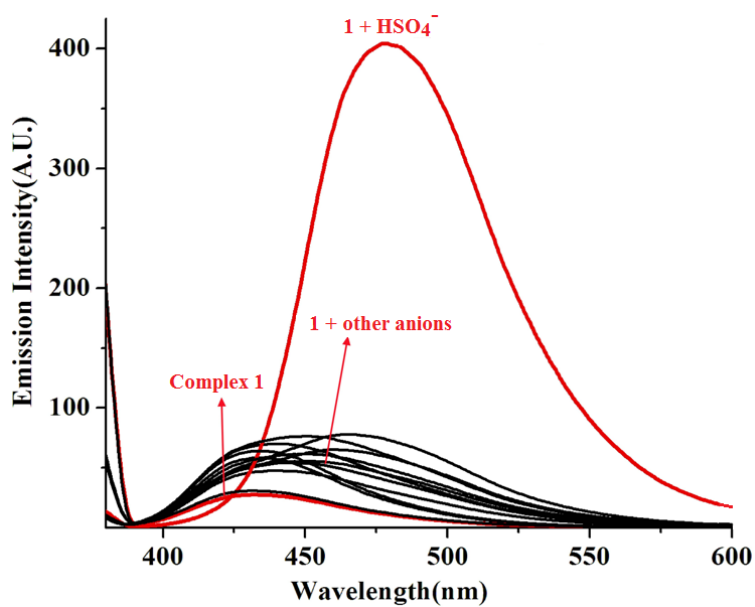

**Fig. S12** Anion selectivity of complex 1 (10 μM) in presence of different anions (1000 μM) in DMSO: water (1:9).

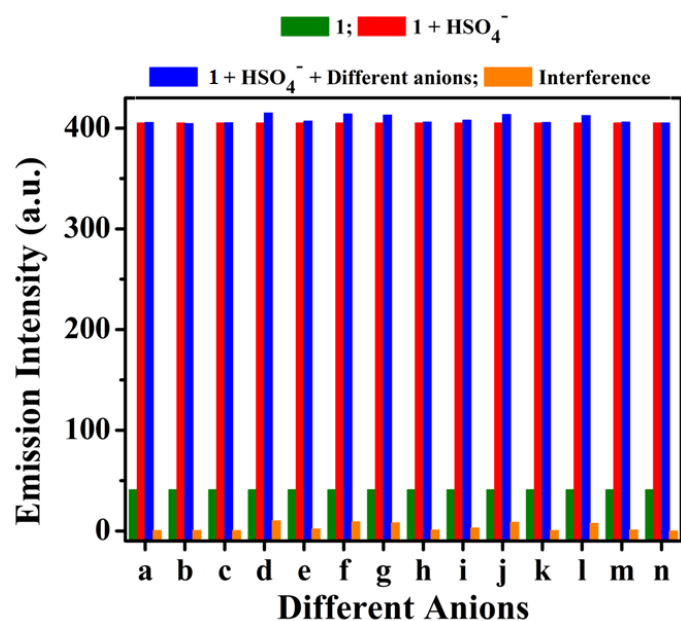

**Fig. S13** Interference of different anions (50  $\mu\text{M}$ ) in presence of complex **1** (5.0  $\mu\text{M}$ ) and  $\text{HSO}_4^-$  (5.0  $\mu\text{M}$ ) in DMSO: water (1:9) at 25  $^\circ\text{C}$  where a)  $\text{F}^-$ , b)  $\text{OAc}^-$ , c)  $\text{I}^-$ , d)  $\text{Br}^-$ , e)  $\text{N}_3^-$ , f)  $\text{CN}^-$ , g)  $\text{NO}_3^-$ , h)  $\text{ClO}_4^-$ , i)  $\text{HPO}_4^{2-}$ , j)  $\text{H}_2\text{PO}_4^-$ , k)  $\text{H}_2\text{AsO}_4^-$ , l)  $\text{Cl}^-$ , m)  $\text{HCO}_3^-$ , n)  $\text{SO}_4^{2-}$  at  $\lambda_{\text{em}}=480\text{nm}$ .

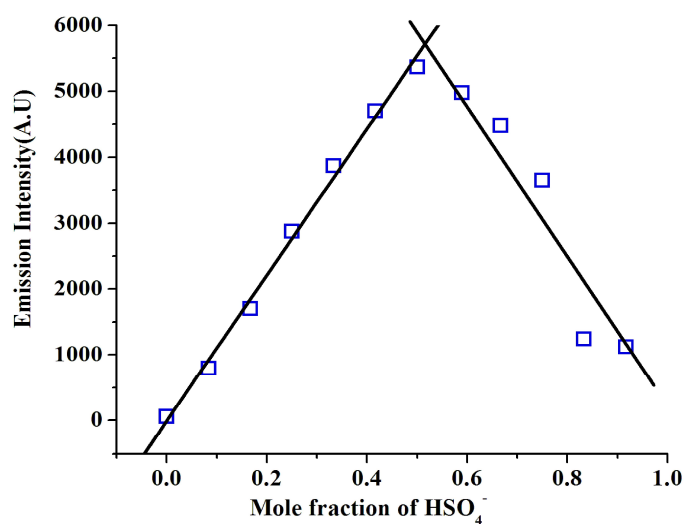

**Fig. S14** Job's plot for stoichiometry determination between complex **1** (10  $\mu\text{M}$ ) and  $\text{HSO}_4^-$  ions in DMSO: water (1:9) at 25  $^\circ\text{C}$  from the emission data at  $\lambda_{\text{em}}=480\text{nm}$ .

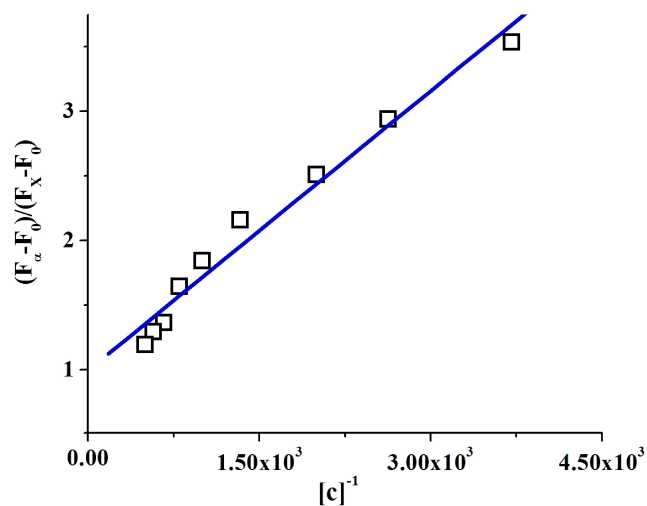

**Fig. S15** Binding constant ( $K_a$ ) value  $1.4 \times 10^5 \text{ M}^{-1}$  determined from the interaction of complex **1** with  $\text{HSO}_4^-$  ions considering the emission data.

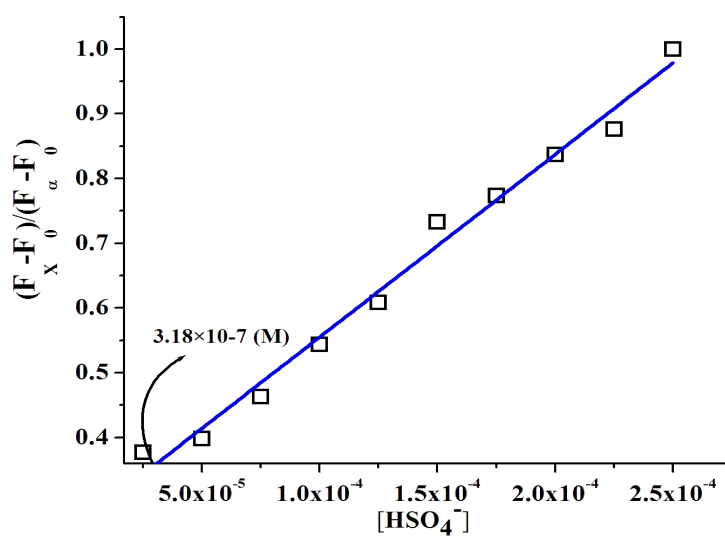

**Fig. S16** Detection limit of  $\text{HSO}_4^-$  ions ( $3.18 \times 10^{-7} \text{ M}$ ) in DMSO: water (1:9) at  $25^\circ \text{C}$  at  $\lambda_{\text{em}} = 480 \text{ nm}$ .

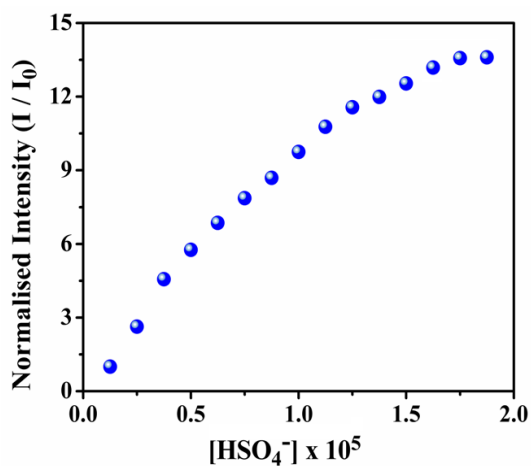

**Fig. S17** Calibration graph of linearity range ( $3.18 \times 10^{-7}$  to  $1.25 \times 10^{-5}$ ) for the detection of  $\text{HSO}_4^-$  ions in DMSO: water (1:9) at 25 °C.

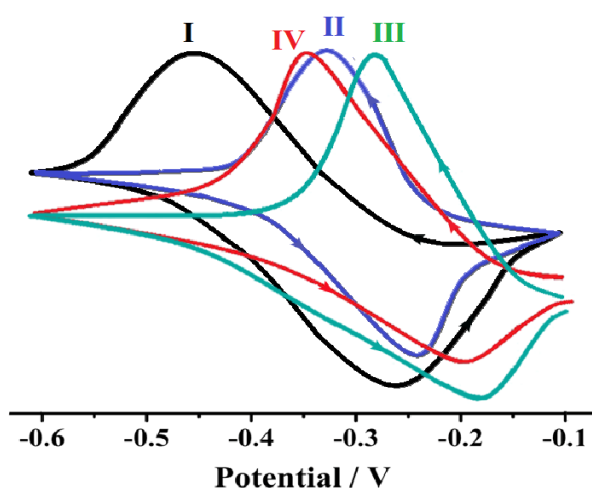

**Fig. S18** Cyclic voltammogram (scan rate 100 mV/s) of complex **1** (I) and **1**. $\text{HSO}_4^-$  adduct (II) **1** in presence of HCl (III) and **1** + HCl +  $\text{SO}_4^{2-}$  (IV) in DMF solution containing 0.1 M TBAP, using platinum working electrode.

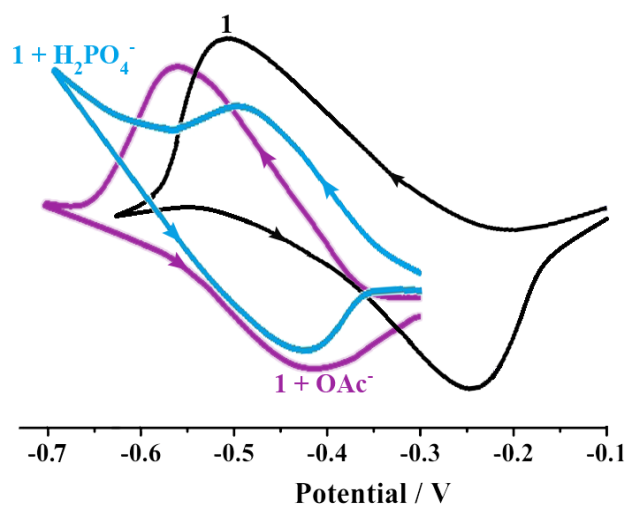

**Fig. S19** Cyclic voltammogram (scan rate 100 mV/s) of complex **1**, **1** in presence of  $\text{H}_2\text{PO}_4^-$  ions and **1** in presence of  $\text{OAc}^-$  ions in DMF solution containing 0.1 M TBAP, using platinum working electrode.

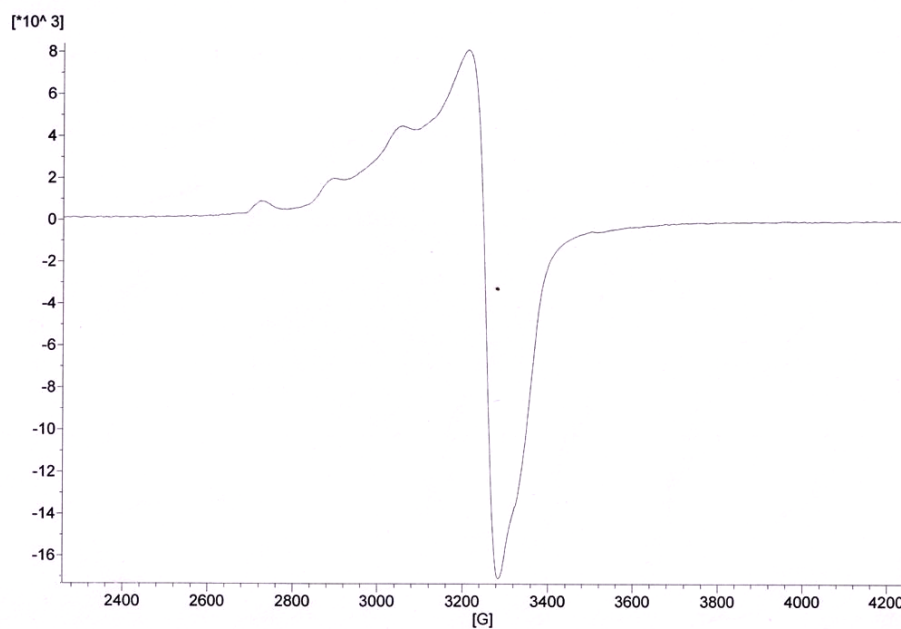

**Fig. S20** EPR spectrum of the complex-1 in methanol at 120 K.

HOMO

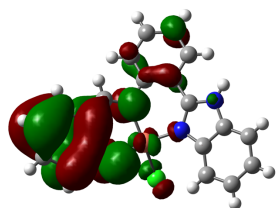

LUMO+5

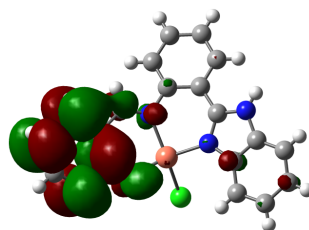

HOMO-1

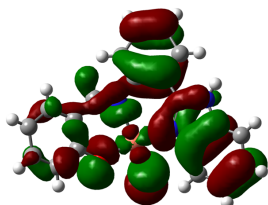

LUMO+4

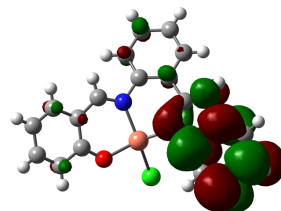

HOMO-2

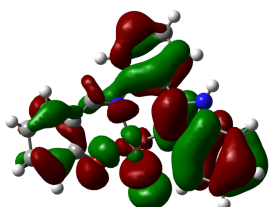

LUMO+3

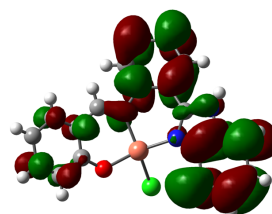

HOMO-3

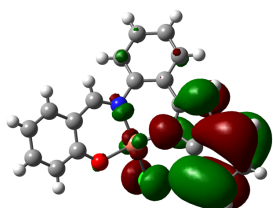

LUMO+2

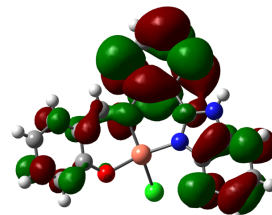

HOMO-4

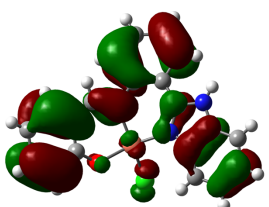

LUMO+1

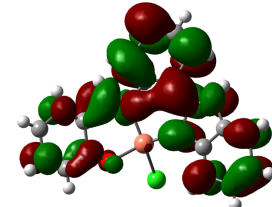

HOMO-5

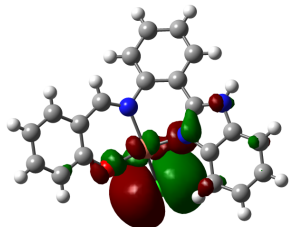

LUMO

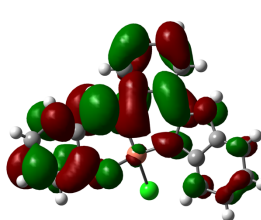

Fig. S21 Some HOMO and LUMO's of complex 1

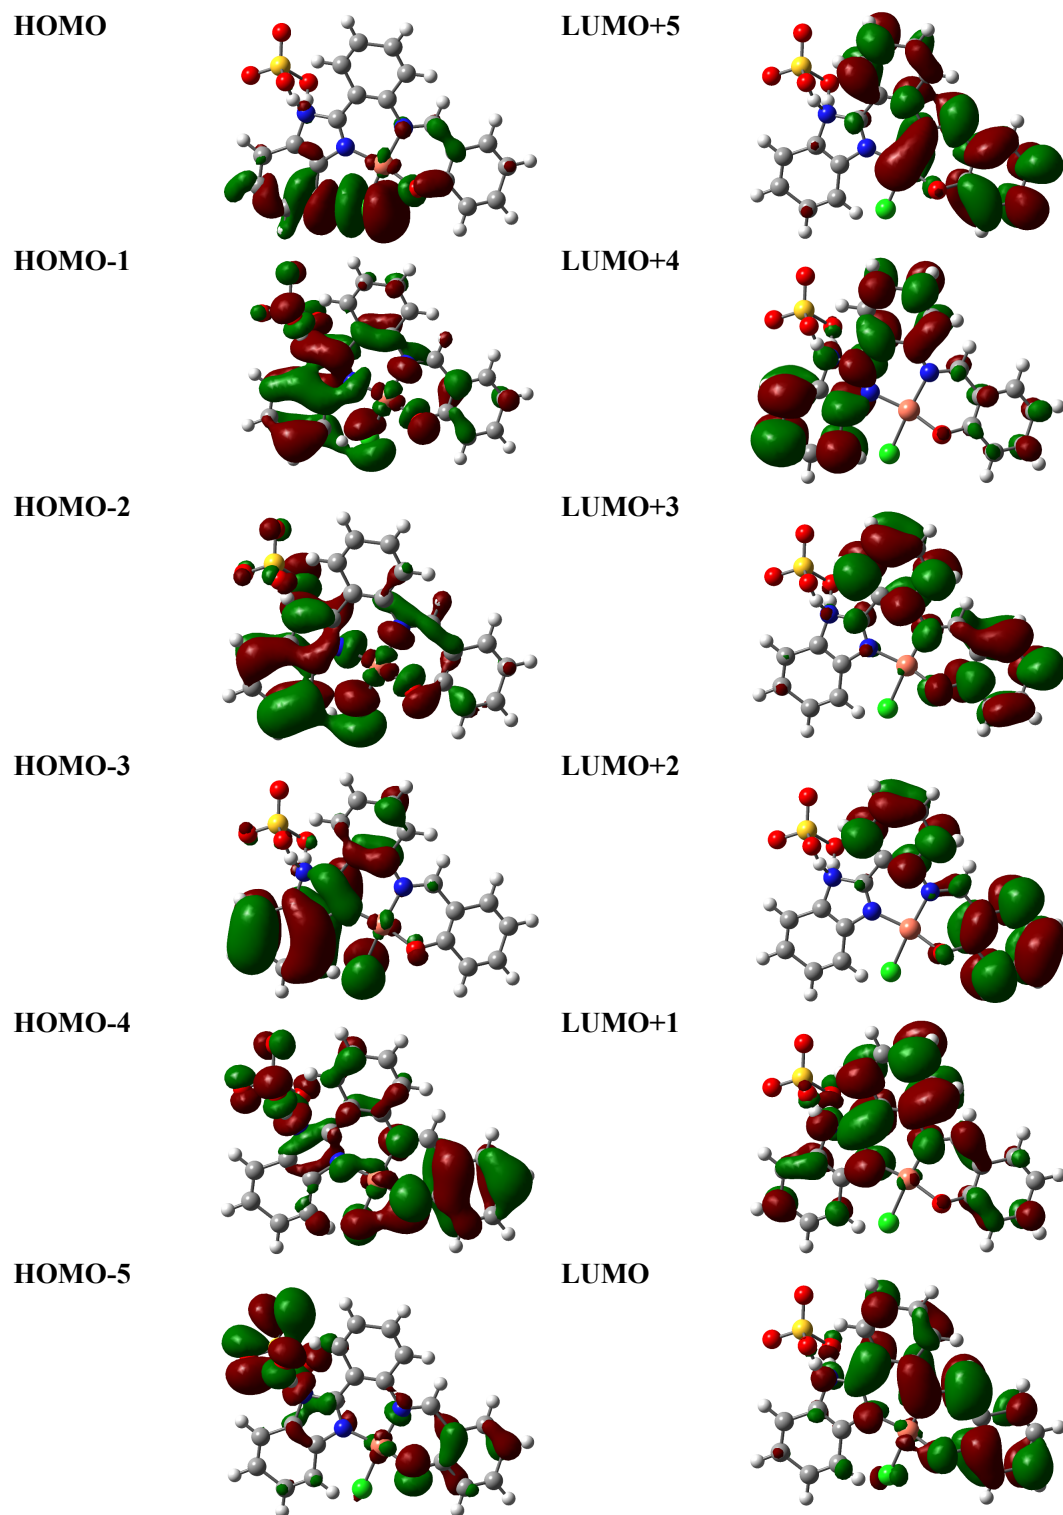

Fig. S22 Some HOMO and LUMO's of 1.HSO<sub>4</sub><sup>-</sup> adduct

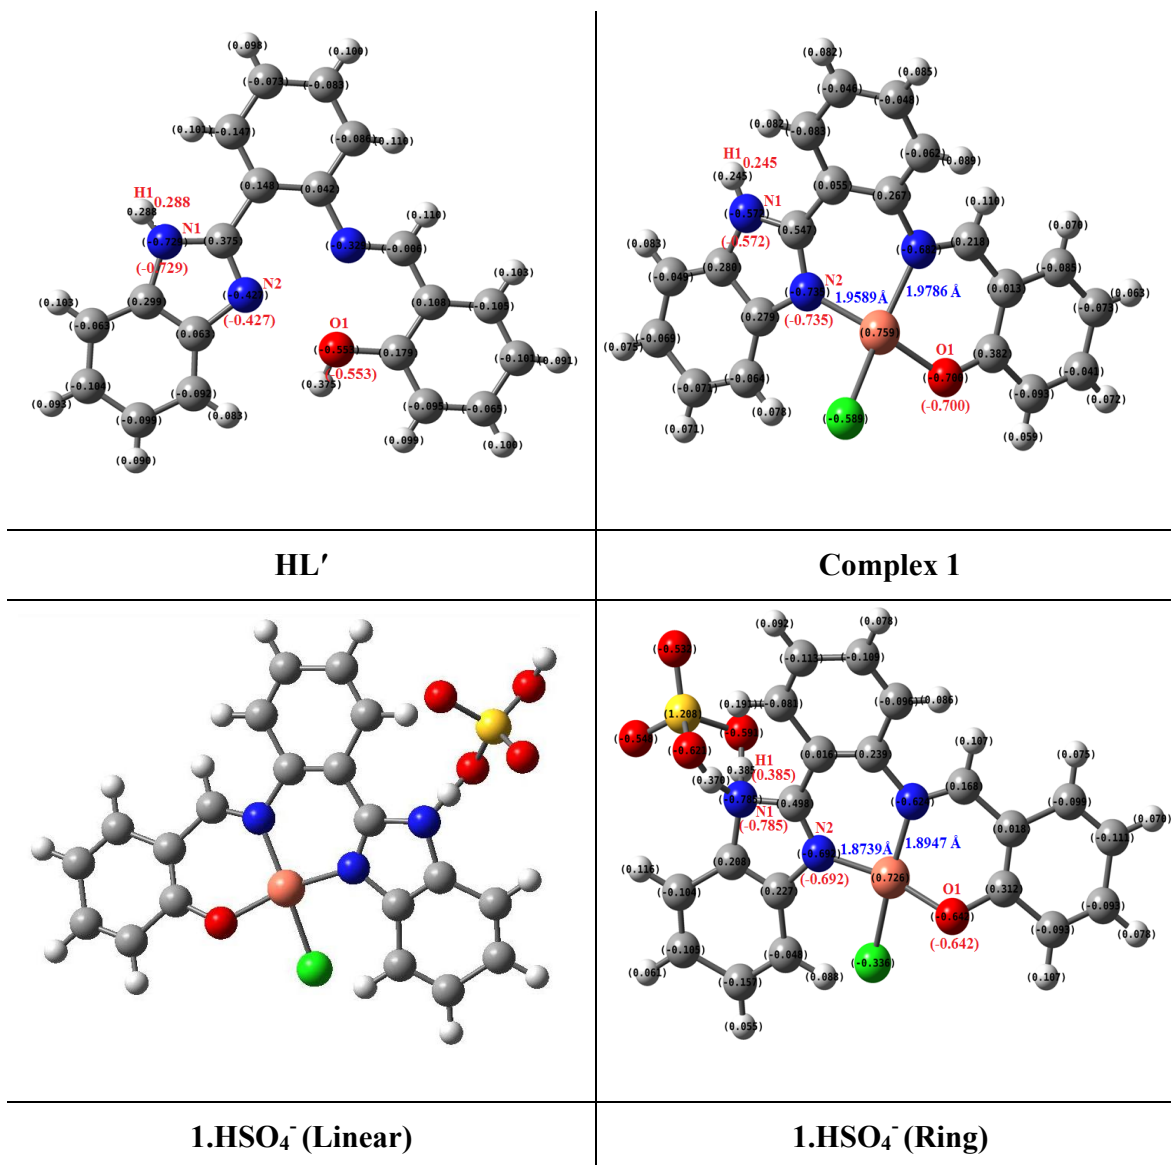

**Fig. S23** Optimized structures of HL', Complex 1, 1.HSO<sub>4</sub><sup>-</sup> (Linear) and 1.HSO<sub>4</sub><sup>-</sup> (Ring) along with the NPA charge distribution.



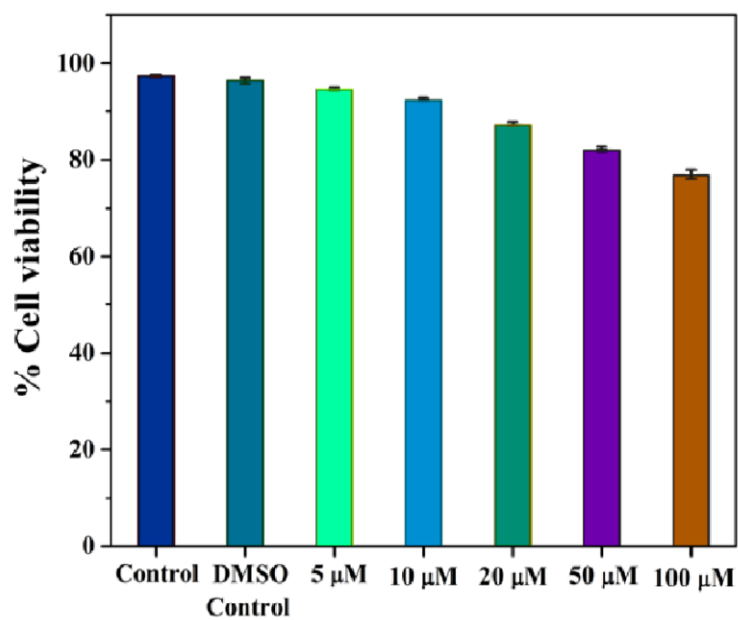

**Fig. S24** Cytotoxic effect of complex 1 (5, 10, 20, and 50  $\mu\text{M}$ ) in HeLa cells incubated for 12 h by MTT assay. Results are expressed as mean of three independent experiments.

**Table S1** Crystal data and details of refinements for HL.NMe<sub>2</sub>CHO and [Cu(L')(Cl)] (1)

|                          | HL.NMe <sub>2</sub> CHO                                       | Complex 1                                              |
|--------------------------|---------------------------------------------------------------|--------------------------------------------------------|
| Empirical Formula        | C <sub>23</sub> H <sub>22</sub> N <sub>4</sub> O <sub>2</sub> | C <sub>20</sub> H <sub>14</sub> Cl Cu N <sub>3</sub> O |
| Formula Weight           | 386.45                                                        | 411.33                                                 |
| Crystal System           | Monoclinic                                                    | Triclinic                                              |
| Space group              | Cc                                                            | P-1                                                    |
| a (Å)                    | 14.7508(11)                                                   | 8.06690(10)                                            |
| b (Å)                    | 9.8446(8)                                                     | 10.2015(2)                                             |
| c (Å)                    | 13.9881(8)                                                    | 10.8792(2)                                             |
| α (°)                    | 90                                                            | 90.4250(10)                                            |
| β (°)                    | 91.028(3)                                                     | 104.9720(10)                                           |
| γ (°)                    | 90                                                            | 94.3570(10)                                            |
| Density (calculated)     | 1.264                                                         | 1.585                                                  |
| Volume (Å <sup>3</sup> ) | 2031.0(3)                                                     | 862.07(3)                                              |
| Temperature, K           | 293(2) K                                                      | 296(2)                                                 |
| Z                        | 4                                                             | 2                                                      |
| F (000)                  | 816                                                           | 418                                                    |
| θ range(deg)             | 2.49 to 22.92                                                 | 2.75 to 28°                                            |
| Collected reflections    | 5292                                                          | 15679                                                  |
| Independent reflections  | 2413 [R(int) = 0.0249]                                        | 4147                                                   |
| Goodness-of-fit          | 0.942                                                         | 1.028                                                  |
| R1 [I > 2.0 σ(I)]        | 0.0402                                                        | 0.0364                                                 |
| wR1 [I > 2.0 σ(I)]       | 0.1057                                                        | 0.0892                                                 |

**Table S2** Selected bond distances (Å) and bond angles (°) for HL.NMe<sub>2</sub>CHO

| Bond distances (Å) |          |             |          |
|--------------------|----------|-------------|----------|
| C13-N3             | 1.395(5) | C20-O1      | 1.356(5) |
| C14-N3             | 1.463(5) | C1-C6       | 1.381(5) |
| C14-N2             | 1.461(4) | C7-C8       | 1.473(5) |
| C7-N1              | 1.302(5) | C14-C15     | 1.515(5) |
| C7-N2              | 1.354(4) | C8-C13      | 1.398(5) |
| C23-N4             | 1.318(6) | C23-O2      | 1.220(5) |
| Bond angles (°)    |          |             |          |
| N1-C7-N2           | 114.1(4) | N3-C14-C15  | 112.8(3) |
| N2-C7-C8           | 117.6(3) | N2-C1-C6    | 104.5(3) |
| C8-C13-N3          | 117.9(3) | C16-C15-C20 | 118.4(3) |
| C13-N3-C14         | 118.8(3) | C6-C1-C2    | 122.7(4) |
| N3-C14-N2          | 105.5(3) | C12-C13-C8  | 119.5(3) |
| O1-C20-C15         | 115.8(3) | O2-C23-N4   | 127.0(4) |
| C1 N2 C14          | 128.9(3) | C22-N4-C23  | 120.7(4) |

**Table S3** Selected bond distances (Å) and bond angles (°) for complex-1

| Bond distances (Å) |            |             |            |
|--------------------|------------|-------------|------------|
| C7-N3              | 1.336(3)   | C16-O1      | 1.311(3)   |
| C8-N2              | 1.374(3)   | C1-C2       | 1.413(3)   |
| C7-N2              | 1.354(3)   | C15-C16     | 1.418(3)   |
| C1-N1              | 1.430(3)   | Cu1-N1      | 1.9786(19) |
| C14-N1             | 1.296(3)   | Cu1-N3      | 1.9591(18) |
| C14-C15            | 1.426(3)   | Cu1-O1      | 1.9093(16) |
| C8-C9              | 1.405(3)   | Cu1-Cl1     | 2.2425(7)  |
| Bond angles (°)    |            |             |            |
| N3-C7-N2           | 111.2(2)   | N1-C14-C15  | 127.5(2)   |
| N2-C8-C9           | 106.0(2)   | N1-Cu1-O1   | 94.03(7)   |
| C2-C7-N3           | 125.8(2)   | C15-C16-O1  | 123.5(2)   |
| C7-N3-Cu1          | 123.86(16) | C14-C15-C16 | 123.6(2)   |
| N1-C1-C2           | 119.9(2)   | C2-C1-C6    | 119.4(2)   |
| C7-N3-C9           | 106.31(18) | C8-C9-C10   | 120.6(2)   |
| C1-N1-Cu1          | 120.17(15) | C15-C16-C17 | 117.3(2)   |

**Table S4**  $E_{1/2}$  values of complex-1 in presence of different ions

| Composition                                            | <i>ca.</i> $E_{1/2}$ (vs. Ag/AgCl) |
|--------------------------------------------------------|------------------------------------|
| Complex-1                                              | -0.38 V                            |
| <b>1</b> + HSO <sub>4</sub> <sup>-</sup>               | -0.29 V                            |
| <b>1</b> + HCl                                         | -0.23 V                            |
| <b>1</b> + HCl + SO <sub>4</sub> <sup>2-</sup>         | -0.28 V                            |
| <b>1</b> + H <sub>2</sub> PO <sub>4</sub> <sup>-</sup> | -0.46 V                            |
| <b>1</b> + OAc <sup>-</sup>                            | -0.49 V                            |
| <b>1</b> + F <sup>-</sup> / CN <sup>-</sup>            | -0.39 V                            |

**Table S5** HOMO-LUMO energy of Complex-1,  $1.HSO_4^-$  (path-A) and  $1.HSO_4^-$  (path-B)

| Component                        | HOMO (eV) | LUMO (eV) | Difference (eV) |
|----------------------------------|-----------|-----------|-----------------|
| Complex-1                        | -5.7606   | -2.0881   | 3.6725          |
| $1.HSO_4^-$ (Linear)<br>(path-A) | -4.6327   | -1.7404   | 2.8923          |
| $1.HSO_4^-$ (Ring)<br>(path-B)   | -4.7465   | -2.3082   | 2.4383          |

**Table S6** HOMO-LUMO energy of Complex-1,  $1.HSO_4^-$  adduct (Ring)

| Complex-1 |             | $1.HSO_4^-$ ensemble (Ring) |             |
|-----------|-------------|-----------------------------|-------------|
| MO's      | Energy (eV) | MO's                        | Energy (eV) |
| LUMO+5    | 0.9213      | LUMO+5                      | 0.2569      |
| LUMO+4    | 0.3643      | LUMO+4                      | 0.0416      |
| LUMO+3    | 0.3140      | LUMO+3                      | -0.1513     |
| LUMO+2    | -0.2628     | LUMO+2                      | -0.3815     |
| LUMO+1    | -1.5349     | LUMO+1                      | -1.4062     |
| LUMO      | -2.0881     | LUMO                        | -2.3082     |
| HOMO      | -5.7606     | HOMO                        | -4.7465     |
| HOMO-1    | -6.3046     | HOMO-1                      | -5.6594     |
| HOMO-2    | -6.4743     | HOMO-2                      | -5.9321     |
| HOMO-3    | -6.6969     | HOMO-3                      | -6.1767     |
| HOMO-4    | -6.8354     | HOMO-4                      | -6.3081     |
| HOMO-5    | -7.1409     | HOMO-5                      | -6.7601     |

**Table S7** Vertical excitation energies ( $E_{\text{ex}}$ ), oscillator strengths ( $f$ ), and Key transitions of the lowest few excited singlets obtained from TDDFT calculations of complex-1 in H<sub>2</sub>O

| $E_{\text{excitation}}$<br>(eV) | $\lambda_{\text{excitation}}$<br>(nm) | Osc.<br>strength<br>( $f$ ) | Key transitions | CI      | $\lambda_{\text{expt.}}$<br>(nm) |
|---------------------------------|---------------------------------------|-----------------------------|-----------------|---------|----------------------------------|
| 2.7879                          | 444.72                                | 0.0154                      | HOMO → LUMO     | 0.62613 | 403                              |
|                                 |                                       |                             | HOMO → LUMO+1   | 0.35022 |                                  |
| 2.9516                          | 420.05                                | 0.0014                      | HOMO-1 → LUMO+1 | 0.39953 |                                  |
|                                 |                                       |                             | HOMO-1 → LUMO   | 0.48273 |                                  |
| 3.1196                          | 397.43                                | 0.1464                      | HOMO → LUMO     | 0.66109 |                                  |
|                                 |                                       |                             | HOMO → LUMO+1   | 0.66289 |                                  |
| 3.2510                          | 381.37                                | 0.0011                      | HOMO-2 → LUMO+1 | 0.25411 |                                  |
|                                 |                                       |                             | HOMO-1 → LUMO+1 | 0.26693 |                                  |
|                                 |                                       |                             | HOMO-3 → LUMO   | 0.28672 |                                  |
|                                 |                                       |                             | HOMO-1 → LUMO+2 | 0.37261 |                                  |
| 3.2742                          | 378.67                                | 0.0148                      | HOMO-1 → LUMO   | 0.72998 |                                  |
|                                 |                                       |                             | HOMO-3 → LUMO+1 | 0.14366 |                                  |
| 3.3773                          | 367.11                                | 0.0058                      | HOMO-2 → LUMO   | 0.27510 |                                  |
|                                 |                                       |                             | HOMO-1 → LUMO   | 0.68172 |                                  |
|                                 |                                       |                             | HOMO-1 → LUMO+1 | 0.31193 |                                  |
| 3.8217                          | 346.42                                | 0.2276                      | HOMO-1 → LUMO+2 | 0.36965 |                                  |
|                                 |                                       |                             | HOMO-1 → LUMO+1 | 0.63372 |                                  |
| 3.6589                          | 338.86                                | 0.0121                      | HOMO → LUMO+1   | 0.70978 |                                  |
|                                 |                                       |                             | HOMO → LUMO+2   | 0.54503 |                                  |
| 3.7466                          | 330.92                                | 0.0237                      | HOMO-4 → LUMO   | 0.34543 |                                  |
|                                 |                                       |                             | HOMO-1 → LUMO+1 | 0.21471 |                                  |
| 3.9610                          | 313.01                                | 0.0235                      | HOMO-1 → LUMO+1 | 0.58576 | 315                              |
|                                 |                                       |                             | HOMO-4 → LUMO+1 | 0.16163 |                                  |

**Table S8** Vertical excitation energies ( $E_{\text{ex}}$ ), oscillator strengths ( $f$ ), and Key transitions of the lowest few excited singlets obtained from TDDFT calculations of **1.HSO<sub>4</sub><sup>-</sup>** adduct in H<sub>2</sub>O

| $E_{\text{excitation}}$<br>(eV) | $\lambda_{\text{excitation}}$<br>(nm) | Osc.<br>strength<br>( $f$ ) | Key transitions  | CI      | $\lambda_{\text{expt.}}$<br>(nm) |
|---------------------------------|---------------------------------------|-----------------------------|------------------|---------|----------------------------------|
| 1.9368                          | 640.14                                | 0.0150                      | HOMO → LUMO+1    | 0.75351 |                                  |
| 2.5463                          | 486.92                                | 0.0060                      | HOMO- 1 → LUMO   | 0.42705 |                                  |
|                                 |                                       |                             | HOMO- 2 → LUMO   | 0.28939 |                                  |
|                                 |                                       |                             | HOMO- 3 → LUMO   | 0.19760 |                                  |
| 3.0222                          | 410.25                                | 0.2178                      | HOMO- 1 → LUMO   | 0.63511 | 403                              |
|                                 |                                       |                             | HOMO- 2 → LUMO   | 0.59143 |                                  |
|                                 |                                       |                             | HOMO- 3 → LUMO   | 0.32879 |                                  |
| 3.1593                          | 392.44                                | 0.0026                      | HOMO-4 → LUMO    | 0.43603 |                                  |
|                                 |                                       |                             | HOMO- 1 → LUMO+1 | 0.15788 |                                  |
| 3.2196                          | 385.09                                | 0.0409                      | HOMO- 2 → LUMO   | 0.63979 |                                  |
|                                 |                                       |                             | HOMO- 3 → LUMO   | 0.63751 |                                  |
| 3.3724                          | 367.65                                | 0.0059                      | HOMO- 1 → LUMO+1 | 0.46003 |                                  |
|                                 |                                       |                             | HOMO- 3 → LUMO   | 0.55291 |                                  |
|                                 |                                       |                             | HOMO- 4 → LUMO   | 0.26595 |                                  |
| 3.4275                          | 361.74                                | 0.0156                      | HOMO- 1 → LUMO+1 | 0.15746 |                                  |
|                                 |                                       |                             | HOMO- 3 → LUMO   | 0.15247 |                                  |
|                                 |                                       |                             | HOMO- 4 → LUMO   | 0.39940 |                                  |
|                                 |                                       |                             | HOMO- 2 → LUMO+1 | 0.12779 |                                  |
| 3.4676                          | 357.55                                | 0.0626                      | HOMO- 1 → LUMO+1 | 0.45191 |                                  |
|                                 |                                       |                             | HOMO- 2 → LUMO+1 | 0.20431 |                                  |
| 3.8121                          | 325.24                                | 0.0655                      | HOMO → LUMO+2    | 0.51451 |                                  |
|                                 |                                       |                             | HOMO- 2 → LUMO+1 | 0.29795 |                                  |
|                                 |                                       |                             | HOMO- 5 → LUMO   | 0.51463 |                                  |
| 3.8235                          | 324.27                                | 0.0713                      | HOMO- 3 → LUMO+1 | 0.24523 |                                  |
|                                 |                                       |                             | HOMO- 4 → LUMO   | 0.27331 |                                  |
|                                 |                                       |                             | HOMO- 5 → LUMO   | 0.33968 |                                  |
| 3.8555                          | 321.58                                | 0.0122                      | HOMO → LUMO+2    | 0.30880 | 305                              |
|                                 |                                       |                             | HOMO → LUMO+3    | 0.69542 |                                  |
|                                 |                                       |                             | HOMO → LUMO+4    | 0.31867 |                                  |
